# Supplementary material for: Methanol mass poisoning in Iran: role of case finding in outbreak management
Source: Oxford University Press journal article supplement (doi:10.1093/pubmed/fdu038), 2014-06-18
Supplement: fdu038_Supplementary_Data.zip [file fdu038_Supplementary_Data.zip]

Archive with 1 entries (1 files):
- fdu038supp.pdf
